1 **Phylogeny of Holarctic gall wasps of the genera *Diplolepis* and *Periclistus* (Hymenoptera:**  
2 **Cynipidae) based on DNA barcodes**

3

4 **Y. Miles Zhang<sup>1</sup>, Zoltán László<sup>2</sup>, Chris Looney<sup>3</sup>, Avar-Lehel Dénes<sup>2</sup>, Robert H. Hanner<sup>4</sup>,**  
5 **Joseph D. Shorthouse<sup>5</sup>**

6 **1. Department of Entomology and Nematology, University of Florida, Gainesville, FL,**  
7 **USA, 32608.**

8 **2. Department of Biology and Ecology, Babeş-Bolyai University, Cluj-Napoca,**  
9 **Romania**

10 **3. Washington State Department of Agriculture, Olympia, WA, USA, 98504.**

11 **4. Department of Integrative Biology, University of Guelph, Guelph, ON, Canada**

12 **5. Department of Biology, Laurentian University, Sudbury, ON, Canada, P3E 2C6**

13

14 **Abstract**

15 Rose gall wasps *Diplolepis* induce structurally distinct galls on wild roses, which provide  
16 gallers with food and shelter. These galls are attacked by a wide variety of micro-hymenopterans  
17 including another cynipid *Periclistus* that act as inquilines. Both *Diplolepis* and *Periclistus* are  
18 difficult to distinguish based on adult morphology, instead the structural appearance of galls is  
19 often used to distinguish species. Using the mitochondrial gene *COI*, we built phylogenies of  
20 both *Diplolepis* and *Periclistus*, while also estimating the ancestral host use of the inducers. Our  
21 phylogeny recovered the monophyly of *Diplolepis*, which have likely diverged from single- or  
22 multi-chambered leaf gallers to other plant organs. *Periclistus* exhibits a divide between the

23 Palearctic and Nearctic clades, and ranges from specialists to generalists in terms of host  
24 specificity. The molecular results have largely supported the validity of species described in the  
25 literature, with notable exceptions in four species groups. While it is premature to enact any  
26 taxonomic changes without additional molecular markers, this incongruence between  
27 morphological and molecular data indicates these groups need taxonomic revision and gall  
28 morphology alone may be inadequate to delimit species.

29

## 30 **Introduction**

31 Insect galls are one of the most spectacular products of evolution, as they represent  
32 atypical organ-like structures made by plants under the direction of stimuli provided by insects  
33 (Shorthouse et al. 2005). These novel plant structures provide food and protection from the  
34 elements for the galler (Stone et al. 2002; Stone and Schönrogge 2003; Ronquist et al. 2015).  
35 The ability to induce galls has evolved in 7 Orders of insects, but perhaps the most complex are  
36 those induced by cynipid wasps (Hymenoptera: Cynipidae). The majority of the approximately  
37 1400 described species of gall wasps induce galls on leaves, stems, or roots of oaks (*Quercus* L.)  
38 and roses (*Rosa* L.) (Ronquist et al. 2015). Although seemingly well protected, cynipid galls  
39 attract several species of Hymenoptera with different feeding ecologies ranging from  
40 phytophagous inquilines that feed only on gall tissues, to parasitoids that feed on gall-inhabiting  
41 larvae (Hayward and Stone 2005). The assemblage of all inhabitants associated with a population  
42 of galls induced by the same gall wasp species is considered a component community, and each  
43 species of gall wasp is thought to support a unique gall community (Shorthouse 2010).

44 Interactions among and between cynipid species and their associated communities are  
45 complex (Egan *et al.* 2017, 2018), and construction of qualitative or quantitative food webs to  
46 understand these interactions is challenging (Stone *et al.* 2002). Many gall component  
47 communities are known to contain morphologically cryptic species (Abe *et al.* 2007; Nicholls *et*  
48 *al.* 2010; Forbes *et al.* 2016; Nicholls *et al.* 2018; Zhang *et al.* 2014, 2017), and the addition of  
49 molecular identification tools to aid in both species determination and the discovery of new  
50 species has helped resolve the complex relationships among cynipid gall component  
51 communities (Forbes *et al.* 2016).

52 Gall wasps in the genus *Diplolepis* Geoffroy are mostly restricted to inducing galls on  
53 wild rose species. There have been approximately 50 species described worldwide. Nearly  $\frac{2}{3}$  of  
54 these were described from North America, suggesting the genus is poorly represented in the  
55 Palearctic. However, this could merely reflect a lack of sampling in the Palearctic, as evidenced  
56 by recent descriptions of new species from China (Wang *et al.* 2013). Species identification of  
57 *Diplolepis* based on adult morphology is challenging as few original descriptions are in sufficient  
58 detail and identification keys are lacking (Shorthouse 1993, 2010). Phylogenetic relationships of  
59 *Diplolepis* have been investigated using two mitochondrial gene regions, cytochrome *b* and *12S*  
60 rRNA, but with conflicting results due to limited taxon sampling and poor sequence quality  
61 (Plantard *et al.* 1998).

62 Based on the results of their analyses, Plantard *et al.* (1998) divided the Nearctic  
63 *Diplolepis* species into four groups: “*nebulosa*”, “*polita*”, “*rosaefolii*”, and flanged femur clades.  
64 The Palearctic species were divided into two species groups: “*eglanteriae*” and “*rosae*”.  
65 However, the validity of *Diplolepis* species were not tested, despite some species differing by

66 less than 10 base pairs in *CytB* (Plantard et al. 1998). This brings further doubt into current  
67 identification of *Diplolepis*, which has traditionally separated species based on their distinctive  
68 galls.

69 Inquilines of the genus *Periclistus* Förster (Hymenoptera: Cynipidae) have lost the ability  
70 to induce their own galls (Ronquist et al. 2015), and are obligatorily dependent on completing  
71 their development within galls of *Diplolepis* (Brooks and Shorthouse 1998; Shorthouse and  
72 Brooks 1998). *Periclistus* induce gall tissues of their own from the tissues of the galls they  
73 inhabit. They do not feed on the bodies of the inducers, but the larval inducer is killed during  
74 oviposition by the female *Periclistus* (Shorthouse and Brooks 1998). Feeding by *Periclistus*  
75 causes each larva to be surrounded within its own chamber and as a result the inquiline-modified  
76 galls are structurally different from normal galls (Shorthouse 2010).

77 The phylogenetic position between inquilines and other gall-inducing cynipids has been  
78 controversial, ranging from a single origin of inquilism derived from gall-inducing cynipids  
79 (Liljeblad and Ronquist 1998) to multiple transitions between galler and inquilines (Ronquist *et*  
80 *al.* 2015). The genus *Periclistus* includes 18 described species worldwide, and all members of  
81 the genus are restricted to galls induced by *Diplolepis* to complete their larval development  
82 (Ritchie 1984; Liljeblad and Ronquist 1998; Shorthouse and Brooks 1998; Pujade-Villar et al.  
83 2015). Ritchie (1984) revised the Nearctic *Periclistus* based on morphological characters in his  
84 PhD thesis, but the new species descriptions were not published and thus are not considered valid  
85 names.

86 Studies utilizing a 658 base pair region of the mitochondrial gene cytochrome *c* oxidase  
87 subunit I (*COI*) have demonstrated the ability of this marker to confidently link field collected

88 organisms with a reference sequence of a previously identified species (Hebert et al. 2003).  
89 Species boundaries of *Diplolepis* and their associated inquiline *Periclistus* have been based  
90 exclusively on adult and gall morphology, but species identification is challenging in these  
91 genera (Ritchie 1984; Shorthouse 2010). Similar re-examination of species boundaries of  
92 cynipids and their associated parasitoids have demonstrated the utility of *COI* in integrative  
93 taxonomic revisions, which then leads to taxonomic revisions and description of new species  
94 (Ács et al. 2010; Zhang et al. 2014, 2017). The major aim of this study is to: 1) reconstruct the  
95 phylogeny of *Diplolepis* and map the evolutionary history of *Diplolepis* host use via ancestral  
96 state reconstruction; and 2) test the species concepts of *Diplolepis*, and the inquiline *Periclistus*.  
97

## 98 **Materials and Methods**

### 99 **Specimen collection and deposition**

100 The reference collection of coauthor JDS includes rose gall inhabitants collected over the  
101 past 50 years by himself and graduate students. Adults of *Diplolepis* and *Periclistus* were  
102 obtained by one of two ways. Mature galls initiated the previous year were collected in the  
103 spring after the inhabitants had been exposed to natural cold temperatures, storing them in either  
104 jars or whirl-pak bags at room temperature then removing the adults as they exited. Or, mature  
105 galls were collected in the fall of the year they were induced, placed in whirl-pag bags and the  
106 galls subjected to temperatures of 0 to 3°C in incubators for 3 to 4 months to break diapause. The  
107 bags were then stored at room temperature and adults placed in alcohol as they exited the galls.  
108 In all cases, collections of the distinctive galls induced by each species were placed in separate

109 bags or jars. This reference collection covers a wide geographical area across Canada, as well as  
110 representative collections from USA, Japan, and Turkey.

111           Representative specimens from all collection sites were pin-mounted. Reference  
112 collections of point-mounted specimens from many localities were deposited in the Canadian  
113 National Collection of Insects in Ottawa, Ontario. The remaining many hundreds of thousands of  
114 wet specimens were deposited at the University of Edinburgh in Edinburgh, Scotland under the  
115 care of Graham Stone. Additional voucher specimens from Northwestern USA were provided by  
116 coauthor CL, and are deposited at the Washington State Department of Agriculture Collection in  
117 Olympia, Washington. The Palearctic *Diplolepis* species used in this study were collected from  
118 Romania, Georgia, Russia, and Kazakhstan by coauthor ZL, and vouchers are stored in Babeş-  
119 Bolyai University, Cluj-Napoca, Romania.

120           All specimens used in this study were point mounted and identified to species whenever  
121 possible. Specimens of *Diplolepis* were identified by JDS (n=313), CL (n=14) or LZ (n=24).  
122 Specimens of *Periclistus* (n=260) were identified based on the unpublished key by Ritchie  
123 (1984). We opted to use numbers (eg. *Periclistus* sp.1) to designate unnamed species as their  
124 species descriptions from Ritchie (1984)'s PhD dissertation are considered *nomina nuda* and  
125 invalid. The outgroups for the phylogenetic analyses of *Diplolepis* and *Periclistus* consisted of  
126 *Leibelia fukudae* (Shinji) and *Synophromorpha sylvestris* (Osten Sacken), respectively. The  
127 outgroups were chosen from published sequences of their closest relatives based on the  
128 phylogeny by Ronquist et al. (2015).

129

130 **DNA extraction and PCR amplification**

131 The DNA extraction protocol was performed as part of an unpublished PhD thesis by  
132 Lima (2012). Genomic DNA was extracted from one or two legs removed from each voucher  
133 specimen using the methods outlined in Ivanova et al. (2006) at the Biodiversity Institute of  
134 Ontario, or at the Interdisciplinary Research Institute on Bio-Nano-Sciences of Babes-Bolyai  
135 University in Cluj-Napoca using the Qiagen Blood and Tissue Kit following standard protocol.  
136 The following primer sets were used to amplify the DNA barcode region of *COI*:  
137 Lep-F1 (5'-ATT CAA CCA ATC ATA AAG ATA TTG G-3') and Lep-R1(5'-TAA ACT TCT  
138 GGA TGT CCA AAA AAT CA-3'); or MLep-F1 (5'-GCT TTC CCA CGA ATA AAT AAT A-  
139 3') and MLep-R1 (5'-CCT GTT CCA GCT CCA TTT TC-3'); or LCO1490 (GGT CAA CAA ATC  
140 ATA AAG ATA TTG G) and HCO2198 (TAA ACT TCA GGG TGA CCA AAA AAT CA)".

141 PCR reactions were carried out in 96-well plates in 12.5  $\mu$ L volumes containing: 2.5 mM  
142 MgCl<sub>2</sub>, 5 pmol of each primer, 20 mM dNTPs, 10 mM Tris-HCL (pH 8.3), 50 mM of KCl, 10-  
143 20 ng (1 to 2  $\mu$ L) of genomic DNA and 1 unit *Taq* DNA polymerase (Platinum® *Taq* DNA  
144 polymerase, Invitrogen). PCR thermocycling profile was: 1 cycle of 60 seconds at 94°C, 5 cycles  
145 of 40 seconds at 94°C, 40 seconds at 45°C and 60 seconds at 72°C, followed by 35 cycles of 40  
146 seconds at 94°C, at 51°C and 60 seconds at 72°C, with final extension of 5 minutes at 72°C.  
147 PCR products were visualized on a 2% agarose E-gel (Invitrogen), and positive single bands  
148 were selected for bi-directional sequencing with the BigDye Terminator Cycle Sequencing Kit  
149 on an ABI3730xl DNA Analyzer (Applied Biosystems) at the Biodiversity Institute of Ontario.

150

## 151 **Phylogenetic Analyses**

152 Contigs of *COI* were assembled using Sequencher v4.5 (Gene Codes) and aligned using  
153 MUSCLE (Edgar 2004) implemented in MEGA v7 (Kumar et al. 2016) and manually inspected  
154 by eye. Bayesian inference analyses were conducted using MrBayes v3.2.6 (Ronquist et al.  
155 2012) on the CIPRES Science Gateway (Miller et al. 2009). Each analysis had two independent  
156 searches with four chains and were run for 10,000,000 generations, sampling every 1000, with a  
157 25% burnin discarded. The dataset was not partitioned based on nucleotide position and as it  
158 would limit the amount of data needed for accurate parameter estimation. The best fitting model  
159 of molecular evolution was tested using jModelTest2 (Darriba et al. 2012), and the general time-  
160 reversible model, with a parameter for invariant sites and rate heterogeneity modelled under a  
161 gamma distribution (GTR+I+G) was chosen based on the Bayesian Information Criterion (BIC)  
162 for both taxa. The phylogenetic trees were visualized in FigTree v1.4.2 (Rambaut 2012) and  
163 enhanced using Adobe Illustrator. Intra- and interspecific genetic distances were calculated using  
164 MEGA version 7.0 (Kumar et al. 2016) using the Kimura-2-parameter model (Kimura 1980).  
165 Automatic Barcode Gap Discovery (ABGD) was also performed using K2P model with default  
166 settings (Puillandre et al. 2011). Sequences are publicly available on the Barcode of Life  
167 Database (<http://www.boldsystems.org/>), under the projects DIPNA (*Diplolepis* exiting rose galls  
168 of North America), PERNA (*Periclistus* exiting *Diplolepis* galls of North America), and  
169 PNWHM (Pacific Northwest Hymenoptera).

170 Ancestral state reconstruction of *Diplolepis* was performed using Mesquite v3.5  
171 (Maddison 2008), using a parsimony unordered model. A tree including one individual per  
172 species of *Diplolepis* was used, and coding of the ecological characters for plant organs attacked  
173 and number of chambers is based on previous literature (Güçlü et al. 2008; Shorthouse 2010).



174 **Results**

175 **Phylogenetic Analyses**

176 In total 313 *COI* sequences averaging 597bp were generated from the *Diplolepis*  
177 specimens, including fifteen Nearctic and nine Palearctic species, as well as two undescribed  
178 species collected from Russia and Kazakhstan (Fig. 1, S1). The genus *Diplolepis* is recovered as  
179 monophyletic, and is further divided into the flanged femur and the leaf galler clades. Most the  
180 species were also recovered as monophyletic, with the exception of the following species  
181 grouping together with low intraspecific genetic divergence (<3%): *D. polita* (Ashmead) and *D.*  
182 *bassetti* (Beutenmüller); *D. fusiformans* (Ashmead) and *D. rosaefolii* (Cockerell); *D. nebulosa*  
183 (Bassett), *D. variabilis* (Osten Sacken), and *D. ignota* (Bassett); *D. mayri* (Schlectendal), *D.*  
184 *rosae* (L.), *D. fructuum* (Rübsaamen) and *Diplolepis* sp.1. In contrast, round leaf galls  
185 resembling *D. japonica* (Walker) and *D. eglanteriae* (Hartig) collected in Palearctic are  
186 genetically distinct from those collected in Nearctic (3.43%), and therefore was split into two  
187 groups. The genetic distances is calculated by combining *Diplolepis* with very low divergences  
188 grouped into species groups, and intraspecific divergence ranged from 0 - 2.44% while  
189 interspecific divergence ranged from 4.60-17.55%.

190 The ancestral state reconstruction showed that ancestral *Diplolepis* induced single- or  
191 multi-chambered galls in leaf tissues in unfolded leaf buds. A shift between single- to multi-  
192 chambered galls and from leaf to stem evolved multiple times, once in flanged femur clade and  
193 four times in the leaf galler clade (Fig. 2, 3).

194 A total of 260 *COI* sequences averaging 597bp were used for the *Periclistus* analysis  
195 (Fig. 4, S2). The intraspecific divergence ranged from 0.13 - 2.16% while interspecific  
196 divergence ranged from 3.55-9.30%. The genus *Periclistus* is recovered as monophyletic and is  
197 further divided into the Nearctic (*P. arefactus* McCracken and Egbert, *P. pirata* (Osten Sacken),  
198 *P. piceus* Fullaway, and two unidentified species labeled as *Periclistus* sp.1 and *Periclistus* sp.2)  
199 and Palearctic clades (*Periclistus brandtii* and *P. caninae* ).

## 200 Discussion

### 201 Phylogeny of *Diplolepis* and Species Delimitation

202 This study is the first large molecular phylogenetic dataset to test the current species  
203 boundaries of the *Diplolepis* rose gall wasps. Most of the *Diplolepis* species were recovered as  
204 monophyletic groups, with the exception of *D. polita* + *D. bassetti*, *D. fusiformans* + *D.*  
205 *rosaefolii*, *D. ignota* + *D. nebulosa* + *D. variabilis*, and *D. mayri* + *D. rosae* + *D. fructuum* +  
206 *Diplolepis* sp.1 which were recovered with very little genetic differences between them (Fig. 1).  
207 In addition, the round leaf galls that resemble *D. eglanteriae*/*D. japonica* were split into  
208 Palearctic and Nearctic clades due to high genetic divergence. ABGD recovered a total of 17  
209 species groups, which is consistent with our analysis (Fig. 1).

210 The *Diplolepis* tree divides into two major clades. The flanged femur clade was also  
211 recovered by Plantard et al. (1998), and includes exclusively Nearctic species that have the  
212 synapomorphic trait of flanged hind femora. Members of this clade oviposit on the stem tissue at  
213 the base of leaf buds, which develops as galls on stems [*D. triforma* Shorthouse & Ritchie, *D.*

214 *californica* (Beutenmüller), *D. oregonensis* (Beutenmüller), *D. spinosa*, *D. nodulosa*] or  
215 adventitious roots [*D. radicum* (Osten Sacken)] of the plant.

216         The leaf galler clade includes all the species that do not have flanged hind femora, and  
217 includes species from both Palearctic and Nearctic regions that induce single or multi-chambered  
218 galls from either leaflets within buds or from tissues at the base of developing leaflets. Multiple  
219 species within the leaf galler clade have very low intraspecific genetic differences despite  
220 distinct having gall morphology (Fig. S1). This leaf galler clade was recovered as five separate  
221 lineages by Plantard et al. (1998), with the three Palearctic species grouping closer to the flanged  
222 femur clade. This polytomy observed by Plantard et al. (1998) is likely due to limited data, as  
223 they were only able to recover <400bp sequence fragments. This clade can be further split into  
224 three subclades. The Nearctic leaf galler subclade includes *D. gracilis* (Ashmead), *D. nebulosa*,  
225 *D. variabilis*, and *D. ignota*, and induces single or multi-chambered galls on leaves. The *ignota*  
226 group consists of *D. ignota*, *D. variabilis*, and *D. nebulosa*, all three of which induce spherical  
227 galls on the abaxial (lower) surface of leaves and have similar genetic sequences. Their galls  
228 range from single to multi-chambered, and are found on *R. arkansana* Porter (*D. ignota*) or *R.*  
229 *woodsii* (*D. variabilis* and *D. nebulosa*) from early spring to late summer (Shorthouse 2010).  
230 This result is congruent with Plantard et al. (1998), where only 1–3 base pair substitutions were  
231 observed in *CytB* between these three *Diplolepis* species.

232         The Palearctic multi-chamber subclade includes *D. fructuum*, *D. mayri*, *D. rosae*, *D.*  
233 *spinosissimae* (Giraud), and two undescribed species. *Diplolepis* sp.1 falls close to *D. rosae* with  
234 very little genetic divergence, but its gall may be single- or multi-chambered and appear on the  
235 leaf-vein or the stem. *Diplolepis* sp.2 is the sister group of *D. spinosissimae*, and induces single-

236 chambered galls in the interior walls of hips. In our analysis the *rosae* group, which consists of  
237 *D. rosae*, *D. mayri*, *D. fructuum*, and *Diplolepis* sp.1 all have distinct gall morphology, but lack  
238 genetic variation based on *COI* data. In the past *D. fructuum* has been considered a geographic  
239 race of *D. mayri* (Güçlü et al. 2008), and our result once again casts doubt on the validity of  
240 these species. *Diplolepis rosae* and *D. mayri* have been introduced to North America  
241 (Shorthouse 2001). We included samples of *D. rosae* from both its native and introduced range,  
242 which exhibited little genetic differences between populations.

243 Finally, there is a mixed leaf gall subclade including both Palearctic [*D. eglanteriae*, *D.*  
244 *japonica*, *D. nervosa* (Curtis)] and Nearctic species [*D. bicolor* (Harris), *D. polita*, *D. bassetti*, *D.*  
245 *rosaefolii*, *D. fusiformans*] (Güçlü et al. 2008; Shorthouse 2010). Almost all members of this  
246 group induce galls on leaf tissue, with the only exception being *D. fusiformans*, a species that  
247 forms small, fusiform galls on-immature rose stems (Shorthouse 2010). The leaf galler *D.*  
248 *rosaefolii* was rendered paraphyletic by *D. fusiformans*. These two species are amongst the  
249 smallest Nearctic species, and are often found in the same habitat and on the same individual  
250 plant. It is possible that they are conspecific and capable of attacking both leaf and stem tissues.  
251 Similarly, the *polita* group consisting of *D. polita* and *D. bassetti* also have very little genetic  
252 difference, and both induce spiny, single-chambered galls on the adaxial (upper) surface of the  
253 leaf in the spring (Shorthouse 2010). The main differences between the two species are largely  
254 based on host plant and gall surface structures, as the galls of *D. polita* are generally weakly-  
255 spined and found on *R. acicularis* Lindl. (Shorthouse 1973) and *R. nutkana* Presl., whereas the  
256 galls induced by *D. bassetti* are mossy in appearance and mostly found on *R. woodsii* Lindl.  
257 (Shorthouse 2010). The Palearctic species *D. eglanteriae* was also thought to have been

258 introduced to North America (Shorthouse 2001), however, specimens collected in Canada were  
259 genetically divergent from its conspecifics in Palearctic. This is further confounded by the  
260 inclusion of *D. japonica* as the sister group to Palearctic *D. eglanteriae* clade, which also induces  
261 round galls on rose leaves and is grouped together with the Palearctic *D. eglanteriae* clade.  
262 Therefore, we separated the round galls collected from Palearctic and Nearctic into two separate  
263 groups, but future studies with larger sample size from both Europe, Asia and North America is  
264 needed to fully delimit the boundaries of these species.

265 *Diplolepis* identification is primarily based on a combination of geography, host plant,  
266 and gall morphology rather than adult wasp morphology, which could have resulted in the over-  
267 splitting of species. Alternatively, mitochondrial genes such as *COI* and *CytB* may not delimit  
268 certain *Diplolepis* species complexes due to introgression or incomplete lineage sorting that leads  
269 to mitonuclear discordance, which has been observed in a variety of insects, including cynipids  
270 (Linnen and Farrell 2007; Yang and Rannala 2010; Nicholls et al. 2012). Therefore, without the  
271 inclusion of additional nuclear genes and extensive morphological study of the type materials,  
272 we are hesitant to propose taxonomic changes based on *COI* data alone.

### 273 **Delimiting *Periclistus* using DNA barcodes**

274 Similar to the gallers, the *COI* data were able to delimit the *Periclistus* species associated  
275 with *Diplolepis* galls into seven species (Fig. 4). *Periclistus caninae*, *P. brandtii*, *P. pirata*, *P.*  
276 *piceus*, and *Periclistus* sp.1 are inquilines of multiple species of galls: *P. caninae* and *P. pirata*  
277 attacks both single- and multi-chambered galls; *P. piceus* and *Periclistus* sp.1 reared exclusively  
278 from the single-chambered galls; while *P. brandtii* exclusively inhabits multi-chambered galls

279 (Fig. S2). All five generalist *Periclistus* species are capable of modifying the small, single-  
280 chambered galls such as *D. nodulosa* and *D. polita* to larger, multi-chambered galls (Brooks and  
281 Shorthouse 1998; LeBlanc and Lacroix 2001; Shorthouse 1980). The presence of inquilines has  
282 been shown to change the community dynamics of the galls as the inducers are usually killed by  
283 *Periclistus* during oviposition (Shorthouse and Brooks 1998) and by altering the gall size and  
284 number of inhabitants in larger, multi-chambered galls where some inducers can survive the  
285 inquiline oviposition (László and Tóthmérész 2006). Additionally, this alteration in gall  
286 community also attracts additional specialist parasitoids that only feed on *Periclistus* (Zhang et  
287 al. 2014, 2017). However, not all *Periclistus* attack multiple species of galls, as *P. arefactus* and  
288 *Periclistus* sp.2 are only associated with a single species of *Diplolepis*.

289         With the addition of these two undescribed *Periclistus* species, the Holarctic diversity of  
290 *Periclistus* is increased to 14 species (Pujade-Villar et al. 2015). Our phylogeny includes less  
291 than half of the known species, so it is unclear whether this Palearctic/Nearctic divide will hold  
292 once more specimens are added. The description of these two new *Periclistus* species and the  
293 taxonomic revision of the genus are beyond the scope of this paper, however, we recommend  
294 revisions that utilize molecular data as a guide for species descriptions as some of the  
295 morphological differences used by Ritchie (1984) differed from our *COI* results.

## 296 **Biogeography of rose, *Diplolepis*, and *Periclistus***

297         As is the case with most highly specialized phytophagous insects, *Diplolepis* gall-  
298 inducers are restricted to attacking closely related plants of the same genus. In the case of  
299 *Diplolepis* and *Periclistus*, all host plants are shrubs of the genus *Rosa* and the phylogeny of the

300 insects cannot be understood without first discussing the host plants. Based on *Rosa* species list  
301 available in electronic databases there are 86 species in Europe ([ww2.bgbm.org](http://www.bgbm.org)), 95 species in  
302 China ([www.efloras.org](http://www.efloras.org)) and 33 species in North-America ([www.efloras.org](http://www.efloras.org)). However, the  
303 number of *Diplolepis* species is the largest in North-America, and smallest in Europe, while from  
304 the Eastern Palearctic only a few species were described (Abe et al. 2007). The rose species with  
305 the largest distribution area is *Rosa acicularis*, which is Holarctic in the northern regions of  
306 Europe, Asia, and North America ([www.efloras.org](http://www.efloras.org)). Roses are notoriously difficult to identify,  
307 with some species are characterized by extensive continuous morphological variation that blurs  
308 their limits with each other and with their ancestors (Wissemann and Ritz 2007). Besides their  
309 intraspecific variability, wild roses readily hybridize resulting in species boundaries that are hard  
310 to define (Bruneau et al 2007, Joly et al 2006). However, the propensity to hybridize is likely a  
311 characteristic that provides new opportunities for *Diplolepis* to exploit and has contributed to  
312 speciation within the genus.

313         Based on recent biogeographic work on *Rosa*, the genus mostly likely evolved during  
314 Eocene in Asia and Western North America, and most extant American species are the results of  
315 re-colonization from Asia through the Bering Land Bridge (Fougère-Danezan et al. 2014). The  
316 genetic exchange between the two continents through the land bridge is also reflected in  
317 *Diplolepis* phylogeny, where multiple subclades within the leaf galler clade have mixed  
318 Palearctic and Nearctic species. The origin of *Diplolepis* is likely Palearctic, as the only fossil of  
319 the tribe Diplolepidini is found in Thorness Bay in United Kingdom which dates to Late Eocene  
320 (Antropov et al. 2014). This Palearctic origin is also strengthened by the fact that *Liebelia*, the  
321 sister group of *Diplolepis* that also attacks *Rosa*, is found exclusively in Palearctic. Our ancestral

322 state reconstruction used the poorly known *Liebelia* as the outgroup, which induces single- or  
323 multi-chambered galls on rose leaves and shoots, having hairy or spiny surfaces showing their  
324 highest diversity in central Asia (seven species) with only one western and one eastern Palearctic  
325 species (Vyrzhikovskaja 1963, Abe et al. 2007). The ancestral plant organ attacked by *Diplolepis*  
326 is likely also leaf galls (Fig. 2, 3), as they require immature tissues for oviposition and feeding by  
327 freshly hatched larvae. Such tissues are present in copious amounts on rose shrubs early in the  
328 spring, it is argued that the first *Diplolepis* galls were on the leaves. From these early galls,  
329 such as those of *D. polita* on *R. acicularis*, or *D. bicolor* on *R. blanda*, part of the populations  
330 existing galls in the spring could have been late in their development. It is conceivable that these  
331 later appearing adults laid into leaf buds in late summer resulting in a separation from the spring  
332 species and in time, structurally distinct galls appeared.

333         The secondary switch from gall induction on leaves to other plant organs, and from  
334 single- to multi-chambered galls has evolved multiple times (Fig. 2, 3). The flanged femur clade  
335 consists almost exclusively of multi-chambered stem galls, a synapomorphic trait that has  
336 likely resulted in the diversification of this clade. The thicker gall walls produced by stem tissue  
337 combined with being multi-chambered may provide additional protections from inquilines and  
338 parasitoids, which would explain the convergent evolution of many *Diplolepis* species to induce  
339 multi-chambered stem galls. Both leaf galls and stem galls lay their eggs on the same tissues,  
340 but on different hosts and yet their galls are strikingly different. Thus, it appears that the  
341 evolution of *Diplolepis* involves sympatric speciation and niche partitioning which occurs by the  
342 positioning of eggs, and then initial larval feeding, in slightly different tissues (Shorthouse et al.  
343 2005). This type of speciation as a result of host or temporal niche partitioning has been recorded



344 in a variety of insects including other Hymenoptera, and is thought to be an important drivers of  
345 insect speciation (Hood et al. 2015, Leppänen et al. 2014, Nicholls et al. 2018, Zhang et al.  
346 2018).

347         Considering the high number of *Rosa* species in the Palearctic (>150), a larger number of  
348 undescribed *Diplolepis* species may be expected in the inner parts of China or in South  
349 Kazakhstan in the Tien-Shan Mountains. From these regions even the described species have no  
350 published structure records (Vyrzhikovskaja 1963, Wang et al. 2013). This makes inference  
351 regarding the species diversification and distribution patterns even more difficult. The  
352 biogeographic pattern of Palearctic *Diplolepis* seems to underline a distribution pattern from  
353 central Asia to Europe and North-America. Rose species such as *Rosa acicularis*, which have a  
354 wide distribution area seem to have mainly single-chambered galls in the Palearctic: *D.*  
355 *spinosissimae* and *D. eglanteriae* or *D. nervosa* (ZL personal observations). Moreover, *Liebelia*  
356 the sister group of *Diplolepis* has also a central Asian diversity peak being present only by one  
357 species both in Europe and the Far East, which also may underline that the speciation center in  
358 the Palearctic is in central Asia.

359         A similar evolutionary trend of increasing gall size is also observed in *Periclistus*, in  
360 which many species are able to modify single-chambered leaf galls into forming distinctly  
361 enlarged, multi-chambered galls (Brooks and Shorthouse 1998; LeBlanc and Lacroix 2001;  
362 Shorthouse 1980). All species of leaf gallers in North America are attacked by *Periclistus*;  
363 however, most of the stem galls are not (Shorthouse 2010), suggesting that the ancestral  
364 *Periclistus* first attacked leaf galls of *Diplolepis*. Leaf galls are easily located and remain small  
365 and succulent for several weeks of their development, providing ample opportunity for

366 ovipositing *Periclistus*. Once established in galls of one species, the resulting adults that exited  
367 galls late in the season could have oviposited in a different gall wasp species, setting the stage for  
368 sympatric speciation.

369

## 370 **Conclusion**

371 The intimate relationships between gall wasps and their associated inquilines and  
372 parasitoids provides an ideal study system for evolutionary ecology and speciation. However,  
373 phylogenetic relationships in these groups remain unresolved. By using the *COI* marker in  
374 combination with wide sampling and detailed ecological data, we were able to build the largest  
375 phylogeny of the rose gall wasps *Diplolepis* to date. The ancestral *Diplolepis* are likely single-  
376 chambered leaf galls, while multiple chambers and host switch to stems have evolved multiple  
377 times. We also used the *COI* data to delimit species of *Diplolepis* and *Periclistus* and found  
378 disparity between gall morphology and molecular data. However, without additional genetic  
379 markers or morphological data of the wasps we chose not to propose taxonomic changes due to  
380 known biases of data interpretation based on a single mitochondrial gene. Regardless of the  
381 utilization of *COI* in cynipid phylogenetics, species identification based on gall or adult  
382 morphology should be viewed with caution, given the unresolved nature of these data. Future  
383 research should utilize an integrative taxonomic approach to resolving evolutionary  
384 relationships, and the incorporation of multi-locus or even genomic-level data should aid in the  
385 resolution of these cryptic but diverse groups of insects.

## 386 **Acknowledgements**

387 We would like to acknowledge J. Lima for sequencing the Canadian *Diplolepis* and  
388 *Periclistus* specimens. Discovery Grants from the Natural Sciences and Engineering Research  
389 Council of Canada and the Laurentian University Research Fund supported the JDS field  
390 collections. The collecting trip of ZL to Russia, Kazakhstan and Georgia belonged to the RO-  
391 CRES expedition, funded by a project of the UBB Cluj, Romania with ID: CNFIS-FDI-2018-  
392 0104. Gall collections by CL in Washington State were partially supported by National Science  
393 Foundation-IGERT award no. 0114304.

394

## 395 References

396  
397

- 398 Abe, Y, Melika, G, Stone, GN. 2007. The diversity and phylogeography of cynipid gallwasps  
399 (Hymenoptera: Cynipidae) of the Oriental and Eastern Palearctic regions, and their  
400 associated communities. *Oriental Insects* **41(1)**: 169-212.
- 401 Ács, Z, Challis, RJ, Bihari, P, Blaxter, M, Hayward, A, Melika, G, Csóka, G, Péntzes, Z, Pujade-  
402 Villar, J, Nieves-Aldrey, J-L. 2010. Phylogeny and DNA barcoding of inquiline oak  
403 gallwasps (Hymenoptera: Cynipidae) of the Western Palearctic. *Molecular*  
404 *Phylogenetics and Evolution* **55(1)**: 210-225.
- 405 Antropov, AV, Belokobylskij, SA, Compton, SG, Dlussky, GM, Khalaim, AI, Kolyada, VA,  
406 Kozlov, MA, Perfilieva, KS, Rasnitsyn, AP. 2014. The wasps, bees and ants (Insecta:  
407 Vespida= Hymenoptera) from the insect limestone (Late Eocene) of the Isle of Wight,  
408 UK. *Earth and Environmental Science Transactions of the Royal Society of Edinburgh*  
409 **104(3-4)**: 335-446.
- 410 Brooks, SE, Shorthouse, JD. 1998. Developmental morphology of stem galls of *Diplolepis*  
411 *nodulosa* (Hymenoptera: Cynipidae) and those modified by the inquiline *Periclistus*  
412 *pirata* (Hymenoptera: Cynipidae) on *Rosa blanda* (Rosaceae). *Canadian Journal of*  
413 *Botany* **76(3)**: 365-381.
- 414 Bruneau, A, Starr, JR, Joly, S. 2007. Phylogenetic relationships in the Genus *Rosa*: New  
415 evidence from chloroplast DNA sequences and an appraisal of current knowledge.  
416 *Systematic Botany* **32(2)**: 366-378.
- 417 Darriba, D, Taboada, GL, Doallo, R, Posada, D. 2012. jModelTest 2: more models, new  
418 heuristics and parallel computing. *Nature Methods* **9(8)**: 772-772.  
419 doi:10.1038/nmeth.2109.

- 420 Edgar, RC. 2004. MUSCLE: multiple sequence alignment with high accuracy and high  
421 throughput. *Nucleic Acids Research* **32(5)**: 1792-1797. doi:10.1093/nar/gkh340.
- 422 Egan, SP, Weinersmith, KL, Liu, S, Ridenbaugh, RD, Zhang, YM, Forbes, AA. 2017.  
423 Description of a new species of *Euderus* Haliday from the southeastern United States  
424 (Hymenoptera, Chalcidoidea, Eulophidae): the crypt-keeper wasp. *Zookeys* (**645**): 37.
- 425 Egan, SP, Zhang, L, Comerford, M, Hood, GR. 2018. Botanical parasitism of an insect by a  
426 parasitic plant. *Current Biology* **28(16)**: R863-R864.
- 427 Fougère-Danezan, M, Joly, S, Bruneau, A, Gao, XF, Zhang, LB. 2014. Phylogeny and  
428 biogeography of wild roses with specific attention to polyploids. *Annals of Botany*  
429 **115(2)**: 275-291.
- 430 Forbes, AA, Hall, MC, Lund, J, Hood, GR, Izen, R, Egan, SP, Ott, JR. 2016. Parasitoids,  
431 hyperparasitoids, and inquilines associated with the sexual and asexual generations of the  
432 gall former, *Belonocnema treatae* (Hymenoptera: Cynipidae). *Annals of the*  
433 *Entomological Society of America* **109(1)**: 49-63.
- 434 Güçlü, S, Hayat, R, Shorthouse, JD, Tozlu, G. 2008. Gall-inducing wasps of the genus  
435 *Diplolepis* (Hymenoptera: Cynipidae) on shrub roses of Turkey. *Proceedings of the*  
436 *Entomological Society of Washington* **110(1)**: 204-217.
- 437 Hayward, A, Stone, GN. 2005. Oak gall wasp communities: evolution and ecology. *Basic and*  
438 *Applied Ecology* **6(5)**: 435-443.
- 439 Hebert, PD, Cywinska, A, Ball, SL. 2003. Biological identifications through DNA barcodes.  
440 *Proceedings of the Royal Society of London B: Biological Sciences* **270(1512)**: 313-321.
- 441 Hood, GR, Forbes, AA, Powell, TH, Egan, SP, Hamerlinck, G, Smith, JJ, Feder, JL. 2015.  
442 Sequential divergence and the multiplicative origin of community diversity. *Proceedings*  
443 *of the National Academy of Sciences*, **112(44)**, E5980-E5989.
- 444 Ivanova, NV, deWaard, JR, Hebert, PD. 2006. An inexpensive, automation-friendly protocol for  
445 recovering high-quality DNA. *Molecular Ecology Resources* **6(4)**: 998-1002.
- 446 Joly, S, Starr, JR, Lewis, WH, Bruneau, A. 2006. Polyploid and hybrid evolution in roses  
447 east of the Rocky Mountains. *American Journal of Botany*. **93(3)**: 412-425.
- 448 Kimura, M. 1980. A simple method for estimating evolutionary rates of base substitutions  
449 through comparative studies of nucleotide sequences. *Journal of Molecular Evolution*  
450 **16(2)**: 111-120.
- 451 Kumar, S, Stecher, G, Tamura, K. 2016. MEGA7: molecular evolutionary genetics analysis  
452 version 7.0 for bigger datasets. *Molecular Biology and Evolution* **33(7)**: 1870-1874.
- 453 László, Z, Tóthmérész, B. 2006. Inquiline Effects on a Multilocular Gall Community. *Acta*  
454 *Zoologica Academiae Scientiarum Hungaricae* **52(4)**: 373-383.
- 455 LeBlanc, DA, Lacroix, CR. 2001. Developmental potential of galls induced by *Diplolepis*  
456 *rosaefolii* (Hymenoptera: Cynipidae) on the leaves of *Rosa virginiana* and the influence  
457 of *Periclistus* species on the *Diplolepis rosaefolii* galls. *International Journal of Plant*  
458 *Sciences* **162(1)**: 29-46.
- 459 Leppänen, SA, Malm, T, Värri, K, Nyman, T. 2014. A comparative analysis of genetic  
460 differentiation across six shared willow host species in leaf-and bud-galling sawflies.  
461 *PloS One*, **9(12)**, p.e116286.
- 462 Liljeblad, J, Ronquist, F. 1998. A phylogenetic analysis of higher-level gall wasp relationships  
463 (Hymenoptera: Cynipidae). *Systematic Entomology* **23(3)**: 229-252.

- 464 Lima, J. 2012. Species richness and genome size diversity in hymenoptera with different  
465 developmental strategies: a DNA barcoding enabled study. Unpublished D. Phil. Thesis.  
466 Guelph University, Guelph, Ontario, Canada.
- 467 Linnen, CR, Farrell, BD. 2007. Mitonuclear discordance is caused by rampant mitochondrial  
468 introgression in *Neodiprion* (Hymenoptera: Diprionidae) sawflies. *Evolution* **61(6)**: 1417-  
469 1438.
- 470 Maddison, WP. 2008. Mesquite: a modular system for evolutionary analysis. *Evolution* **62**:  
471 1103-1118.
- 472 Miller, M, Holder, M, Vos, R, Midford, P, Liebowitz, T, Chan, L, Hoover, P, Warnow, T. 2009.  
473 The CIPRES portals.
- 474 Nicholls, JA, Challis, RJ, Mutun, S, Stone, GN. 2012. Mitochondrial barcodes are diagnostic of  
475 shared refugia but not species in hybridizing oak gallwasps. *Molecular Ecology* **21(16)**:  
476 4051-4062.
- 477 Nicholls, JA, Preuss, S, Hayward, A, Melika, G, Csoka, G, Nieves-Aldrey, J-L, Askew, RR,  
478 Tavakoli, M, Schönrogge, K, Stone, GN. 2010. Concordant phylogeography and cryptic  
479 speciation in two Western Palaearctic oak gall parasitoid species complexes. *Molecular*  
480 *Ecology* **19(3)**: 592-609.
- 481 Nicholls, JA, Schönrogge, K, Preuss, S, Stone, GN. 2018. Partitioning of herbivore hosts across  
482 time and food plants promotes diversification in the *Megastigmus dorsalis* oak gall  
483 parasitoid complex. *Ecology and Evolution* **8(2)**: 1300-1315. doi:10.1002/ece3.3712.
- 484 Plantard, O, Shorthouse, JD, Rasplus, J-Y. 1998. Molecular phylogeny of the genus *Diplolepis*  
485 (Hymenoptera: Cynipidae). In: Csóka G, Mattson WJ, Stone GN, Price, PW, eds. *The*  
486 *Biology of Gall-Inducing Arthropods*. St.Paul: United States Department of Agriculture  
487 Forest Service General Technical Report NC-199, 247-260.
- 488 Puillandre, N, Lambert, A, Brouillet, S, Achaz, G. 2012. ABGD, Automatic Barcode Gap  
489 Discovery for primary species delimitation. *Molecular Ecology* **21(8)**: 1864-1877.
- 490 Pujade-Villar, J, Wang, Y, Guo, R, Chen, X. 2015. Revision on Palaearctic species of *Periclistus*  
491 Förster with description of a new species and its host plant gall (Hymenoptera,  
492 Cynipidae). *Zookeys*(**596**): 65.
- 493 Rambaut, A. 2012. FigTree v1. 4. Molecular evolution, phylogenetics and epidemiology  
494 Edinburgh, UK: University of Edinburgh, Institute of Evolutionary Biology.
- 495 Ritchie, AJ. 1984. A review of the higher classification of the inquiline gall wasps  
496 (Hymenoptera: Cynipidae) and a revision of the Nearctic species of *Periclistus* Förster .  
497 Unpublished D. Phil. Thesis. Carleton University, Ottawa, Ontario, Canada.
- 498 Ronquist, F., Nieves-Aldrey, J-L., Buffington, ML., Liu, Z., Liljebblad, J., Nylander, JA. 2015.  
499 Phylogeny, evolution and classification of gall wasps: the plot thickens. *PLoS One* **10(5)**:  
500 e0123301.
- 501 Ronquist, F, Teslenko, M, Van Der Mark, P, Ayres, DL, Darling, A, Höhna, S, Larget, B, Liu, L,  
502 Suchard, MA, Huelsenbeck, JP. 2012. MrBayes 3.2: efficient Bayesian phylogenetic  
503 inference and model choice across a large model space. *Systematic Biology* **61(3)**: 539-  
504 542. doi:10.1093/sysbio/sys029.
- 505 Shorthouse, JD. 1973. Insect community associated with rose galls of *Diplolepis polita*  
506 (Cynipidae, Hymenoptera). *Quaestiones Entomologicae* **9**: 55-98.

- 507 Shorthouse, JD. 1980. Modification of galls of *Diplolepis polita* by the inquiline *Periclistus*  
508 *pirata*. Bulletin de la Société Botanique de France Actualités Botaniques **127(1)**: 79-84.
- 509 Shorthouse, JD. 1993. Adaptations of gall wasps of the genus *Diplolepis* (Hymenoptera:  
510 Cynipidae) and the role of gall anatomy in cynipid systematics. The Memoirs of the  
511 Entomological Society of Canada **125(S165)**: 139-163.
- 512 Shorthouse, JD. 2001. Galls induced by cynipid wasps of the genus *Diplolepis* (Cynipidae,  
513 Hymenoptera) on cultivated shrub roses in Canada. Acta horticulturae **547**: 91-92.
- 514 Shorthouse, JD. 2010. Galls induced by cynipid wasps of the genus *Diplolepis* (Hymenoptera:  
515 Cynipidae) on the roses of Canada's grasslands. In: Arthropods of Canadian grasslands.  
516 Volume 1: Ecology and Interactions in Grassland Habitats. Edited by J. D. Shorthouse  
517 and K. D. Floate. Biological Survey of Canada Monograph Series No. 3: 251-279.
- 518 Shorthouse, JD, Brooks, SE. 1998. Biology of the galler *Diplolepis rosaefolii* (Hymenoptera:  
519 Cynipidae), its associated component community, and host shift to the shrub rose Thérèse  
520 Bugnet. The Canadian Entomologist **130(3)**: 357-366.
- 521 Shorthouse, JD, Ritchie, AJ. 1984. Description and biology of a new species of *Diplolepis*  
522 Fourcroy (Hymenoptera: Cynipidae) inducing galls on the stems of *Rosa acicularis*. The  
523 Canadian Entomologist **116(12)**: 1623-1636.
- 524 Shorthouse, JD, Wool, D, Raman, A. 2005. Gall-inducing insects–Nature's most sophisticated  
525 herbivores. Basic and Applied Ecology **6(5)**: 407-411.
- 526 Stone, GN, Schönrogge, K. 2003. The adaptive significance of insect gall morphology. Trends in  
527 Ecology & Evolution **18(10)**: 512-522.
- 528 Stone, GN, Schönrogge, K, Atkinson, RJ, Bellido, D, Pujade-Villar, J. 2002. The population  
529 biology of oak gall wasps (Hymenoptera: Cynipidae). Annual review of entomology  
530 **47(1)**: 633-668.
- 531 Vyrzhikovskaja, AV 1963. New gall wasps (Hymenoptera, Cynipidae) from dog-rose in Central  
532 Asia and Kazakhstan. Entomologicheskoe Obozrenie. **42**: 651-659.
- 533 Wang, Y-P, Guo, R, Liu, Z-W, Chen, X-X 2013. Taxonomic Study of the Genus *Diplolepis*  
534 Geoffroy (Hymenoptera, Cynipidae, Diplolepidini) in China, with Descriptions of Three  
535 New Species. Acta Zootaxonomica Sinica **38(2)**: 317-327.
- 536 Wissemann, V., Ritz, CM. 2007. Evolutionary patterns and processes in the genus *Rosa*  
537 (Rosaceae) and their implications for host-parasitic co-evolution. Plant Systematics and  
538 Evolution. **266(1-2)**: 79-89.
- 539 Yang, Z, Rannala, B. 2010. Bayesian species delimitation using multilocus sequence data.  
540 Proceedings of the National Academy of Sciences **107(20)**: 9264-9269.
- 541 Zhang, YM, Gates, MW, Shorthouse, JD. 2014. Testing species limits of Eurytomidae  
542 (Hymenoptera) associated with galls induced by *Diplolepis* (Hymenoptera: Cynipidae) in  
543 Canada using an integrative approach. The Canadian Entomologist **146(03)**: 321-334.  
544 doi:10.4039/tce.2013.70.
- 545 Zhang, YM, Gates, MW, Shorthouse, JD. 2017. Revision of Canadian Eurytomidae  
546 (Hymenoptera, Chalcidoidea) associated with galls induced by cynipid wasps of the  
547 genus *Diplolepis* Geoffroy (Hymenoptera, Cynipidae) and description of a new species.  
548 Journal of Hymenoptera Research **61**: 1-29. doi:10.3897/jhr.61.13466.

549 Zhang, YM, Bass, AI, Fernández, DC, Sharanowski, BJ. 2018. Habitat or temporal isolation:  
550 Unraveling herbivore–parasitoid speciation patterns using double digest RADseq.  
551 *Ecology and Evolution*. Early View. doi.org/10.1002/ece3.4457.

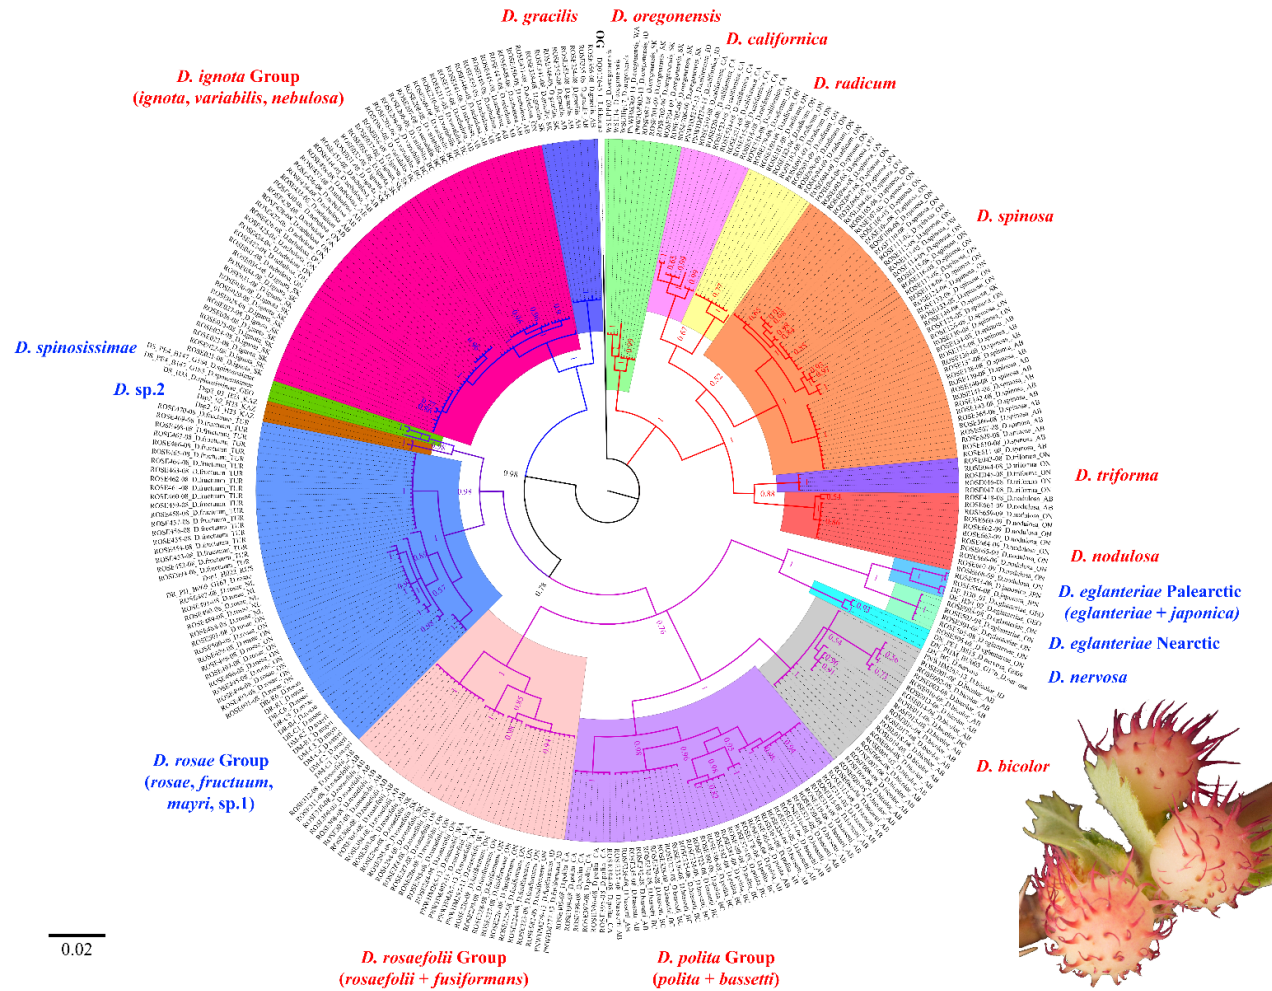

553

554 **Figure 1.** Bayesian inference tree of *Diplolepis* based on *COI*. Values indicate Bayesian posterior probability. The branches  
 555 are color coded by (sub)clades: red = Flanged femur, blue = Nearctic leaf galler, purple = Palearctic multi-chambered galler,  
 556 and pink = Mixed leaf galler. Outgroup is labeled in black, while ingroup species are labelled as either Palearctic (Blue),  
 557 Nearctic (Red), or OG (Outgroup). Photo of *D. polita* gall by YMZ.



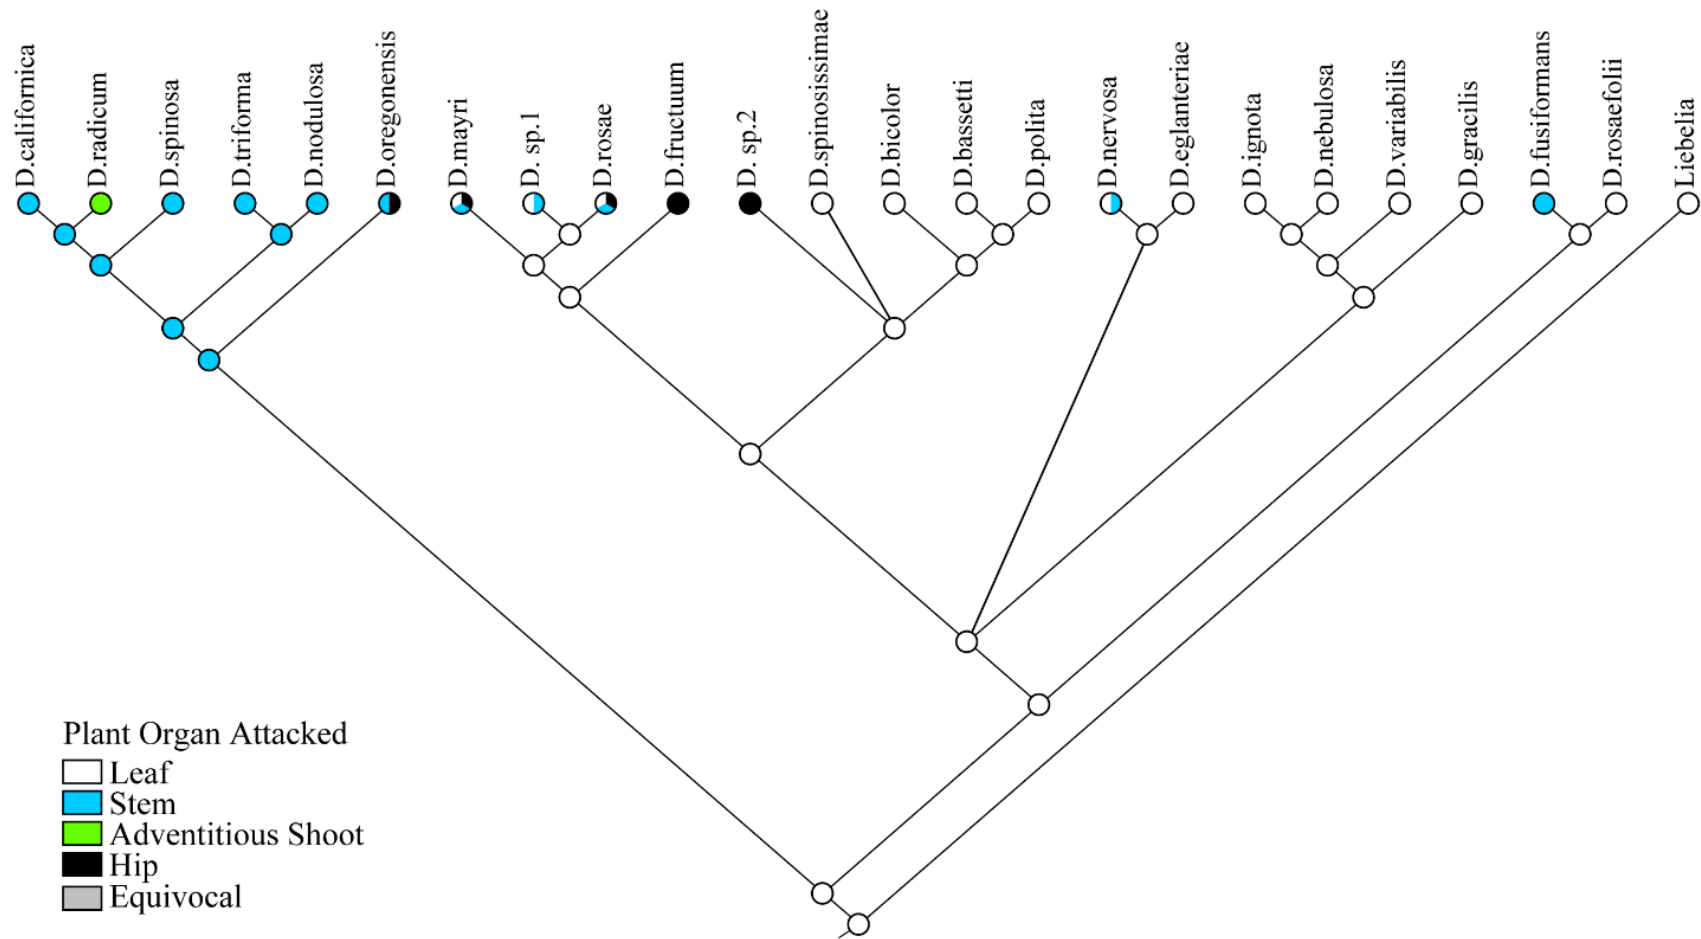

559

560 **Figure 2.** Ancestral state reconstruction of *Diplolepis* based on rose plant organs attacked. *Liebelia fukudae* is used as  
 561 outgroup.

562

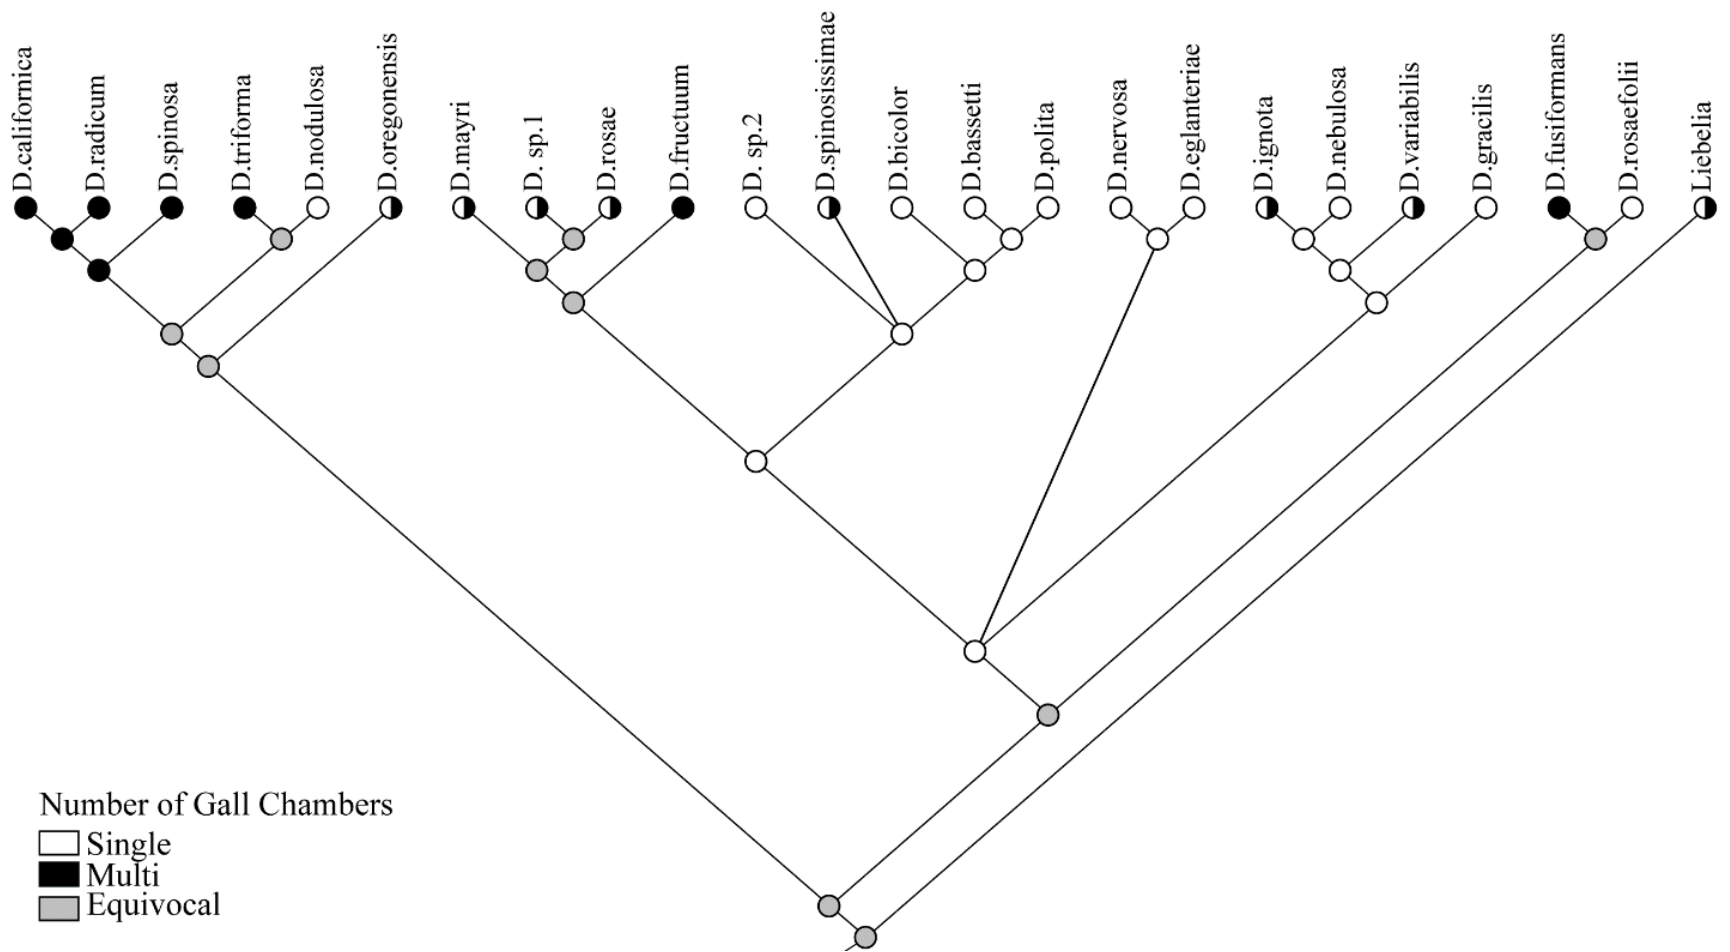

563

564 **Figure 3.** Ancestral state reconstruction of *Diplolepis* based on the number of chambers of the mature galls. *Liebelia fukudae*  
 565 is used as outgroup.

566

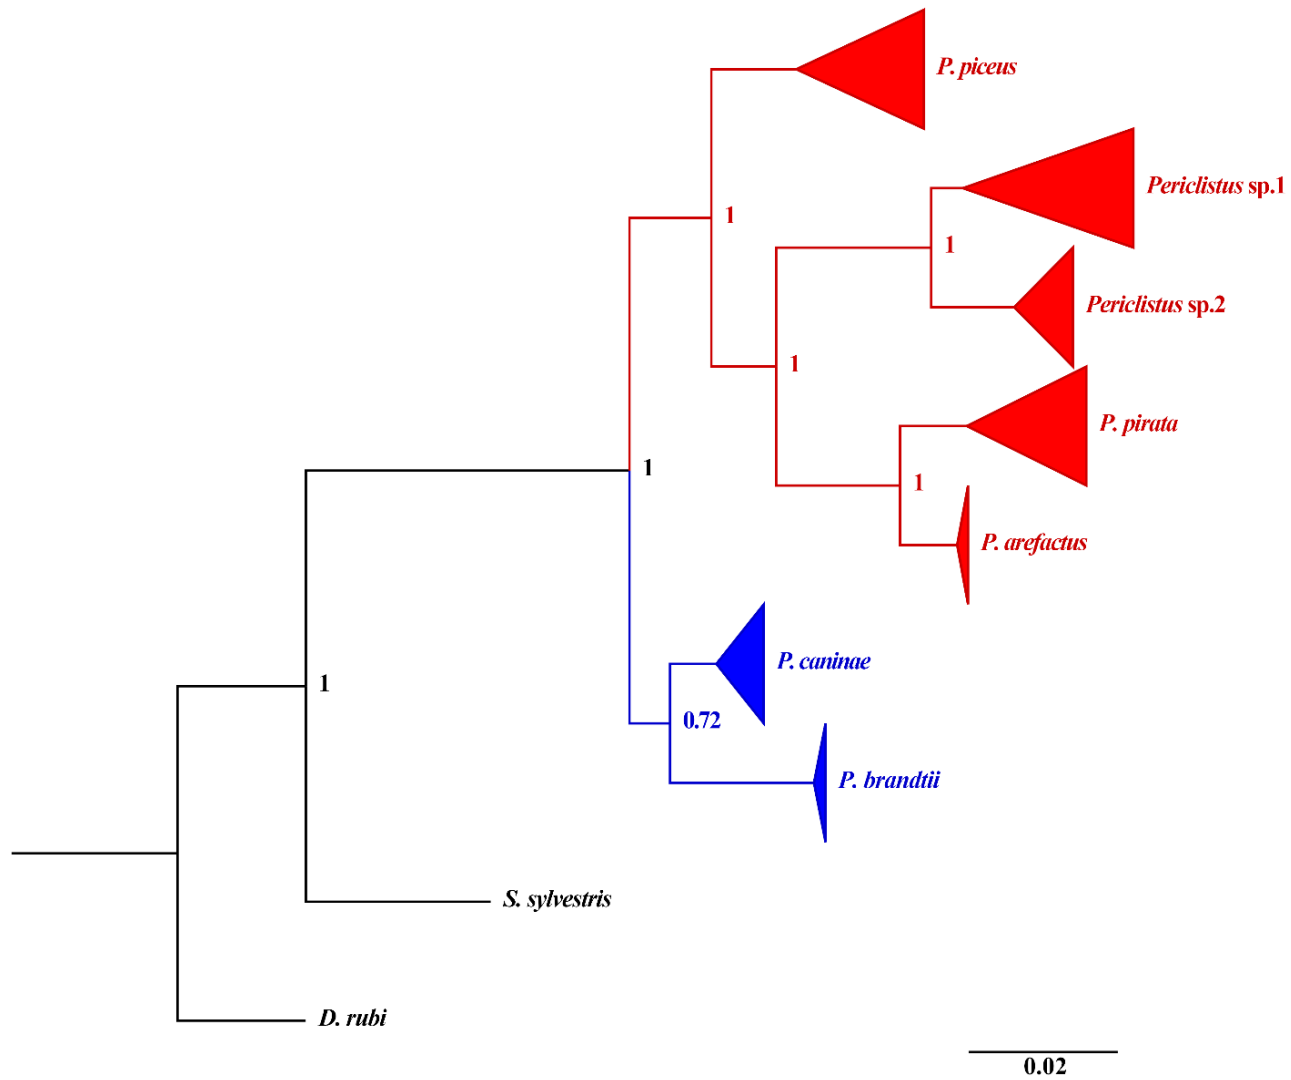

567

568

569 **Figure 4.** Bayesian inference tree of *Periclistus* based on *COI*. Values indicate Bayesian posterior probability. Outgroups are  
 570 labeled in black, while ingroup species are labelled as either Palearctic (Blue) or Nearctic (Red).
